# Supplementary material
Source: ML conference proceedings conference paper supplement (https://openaccess.thecvf.com/content/CVPR_2020/html/Huang_OctSqueeze_Octree-Structured_Entropy_CVPR_2020_paper.html)
Supplement: Supplementary file 1 [file Huang_OctSqueeze_Octree-Structured_Entropy_CVPR_2020_supplemental.zip]

Archive with 4 entries (4 files):
- supplemental_video.mp4
- __MACOSX/._supplemental_video.mp4
- supplemental.pdf
- __MACOSX/._supplemental.pdf
